# Supplementary material
Source: Springer Nature journal article supplement (https://www.springermedizin.de/resource/supplementary/12889_2014_7108_MOESM2_ESM.pdf/9499822)
Supplement: MOESM2 [file 9499822]

a)

## Each serve (125 g) contains

|                  |              |                  |                  |               |
|------------------|--------------|------------------|------------------|---------------|
| Energy<br>476 kJ | Fat<br>3.6 g | Sat Fat<br>2.4 g | Sugars<br>12.8 g | Salt<br>0.1 g |
| 5.0 %            | 5.0 %        | 10.0 %           | 14.0 %           | 2.0 %         |

of an adult's daily intake

b)

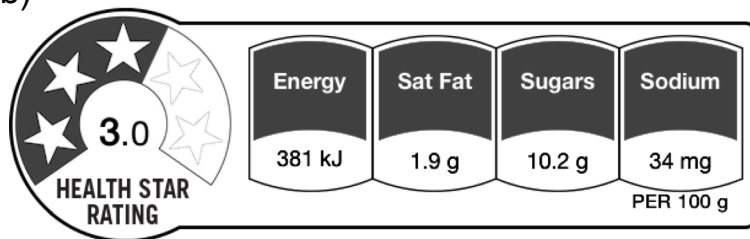

c)

| NUTRITION INFORMATION              |                              |                             |
|------------------------------------|------------------------------|-----------------------------|
| Serving per package: not available |                              |                             |
| Serving size: 200 mL               |                              |                             |
|                                    | Ave. Quantity<br>Per Serving | Ave. Quantity<br>Per 100 mL |
| Energy                             | 360 kJ (86 kcal)             | 180 kJ (43 kcal)            |
| Protein                            | 0.0 g                        | 0.0 g                       |
| Fat - total                        | 0.0 g                        | 0.0 g                       |
| - saturated                        | 0.0 g                        | 0.0 g                       |
| Carbohydrate                       | 21.2 g                       | 10.6 g                      |
| - sugars                           | 21.2 g                       | 10.6 g                      |
| Sodium                             | 20 mg                        | 10 mg                       |
